# Supplementary material for: Elucidation of the shanorellin biosynthetic pathway and functional analysis of associated enzymes
Source: Royal Society of Chemistry journal article supplement (doi:10.1039/c4md00352g), 2014-10-02
Supplement: c4md00352g1.pdf [file c4md00352g1.pdf]

## Supporting Information for

### Elucidation of shanorellin biosynthetic pathway and functional analysis of associated enzymes

Michio Sato,<sup>a</sup> Haruka Yamada,<sup>a</sup> Kinya Hotta<sup>b</sup> and Kenji Watanabe\*<sup>a</sup>

<sup>a</sup> Department of Pharmaceutical Sciences, University of Shizuoka, Shizuoka 422-8526, Japan

<sup>b</sup> School of Biosciences, The University of Nottingham Malaysia Campus, Semenyih, Selangor Darul Ehsan 43500, Malaysia

\*Correspondence e-mail: [kenji55@u-shizuoka-ken.ac.jp](mailto:kenji55@u-shizuoka-ken.ac.jp)

#### Table of Contents

|                                                                                                 |    |
|-------------------------------------------------------------------------------------------------|----|
| <b>Figure S1.</b> Picture of the SDS–PAGE gel of the partially purified CgsF. ....              | S2 |
| <b>Table S1.</b> The <i>cgs</i> gene cluster organization and predicted protein functions. .... | S3 |
| <b>Table S2.</b> Oligonucleotide primer sequences. ....                                         | S4 |

**Figure S1.** SDS-PAGE analysis of the *Escherichia coli*-produced CgsF enriched by metal-affinity chromatography using Ni-NTA Sepharose resin. Lane M: molecular weight marker; lane 1: CgsF (48 kDa).

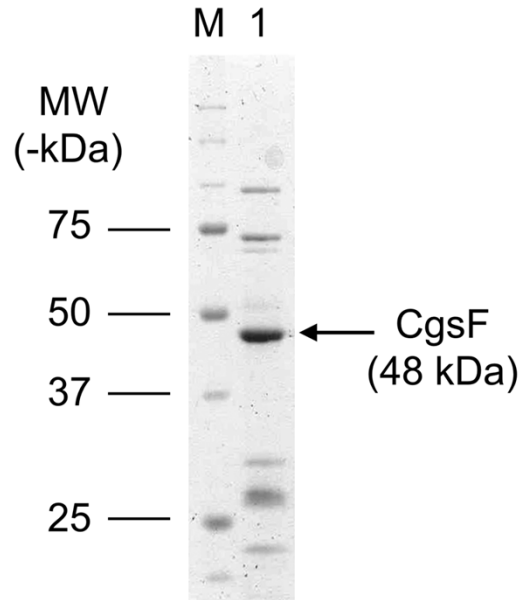

**Table S1.** Organization of the *cgs* gene cluster responsible for the biosynthesis of shanorellin 4, and predicted functions of corresponding translation products.

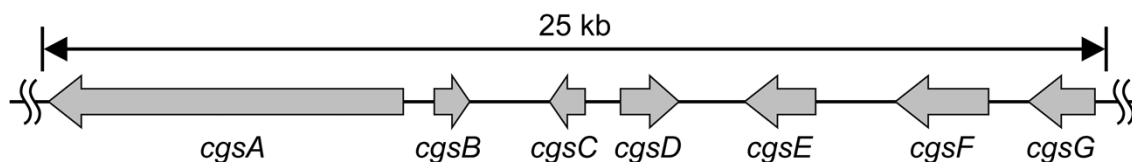

| Gene                        | Amino acids (no) | Proposed protein function<br>(most homologous protein <sup>[a]</sup> , NCBI accession number, species)            | Identity / Similarity (%) |
|-----------------------------|------------------|-------------------------------------------------------------------------------------------------------------------|---------------------------|
| <i>cgsA</i><br>(CHGG_08793) | 2379             | Polyketide synthase<br>(Polyketide synthase putative, XP_002339967, <i>Talaromyces stipitatus</i> )               | 39/56                     |
| <i>cgsB</i><br>(CHGG_08794) | 238              | Cytochrome P450<br>(Unnamed protein product, BAE65443, <i>Aspergillus oryzae</i> )                                | 68/85                     |
| <i>cgsC</i><br>(CHGG_08795) | 262              | SGNH_hydrolase<br>(Carbohydrate esterase family 3 protein, CCD55162, <i>Botryotinia fuckeliana</i> )              | 40/60                     |
| <i>cgsD</i><br>(CHGG_08796) | 378              | Reverse transcriptase<br>(Hypothetical protein, XP_001226257, <i>Chaetomium globosum</i> )                        | 76/79                     |
| <i>cgsE</i><br>(CHGG_08797) | 405              | Hypothetical protein CHGG_08797<br>(Conserved hypothetical protein, XP_002483593, <i>Talaromyces stipitatus</i> ) | 67/79                     |
| <i>cgsF</i><br>(CHGG_08798) | 371              | Salicylate hydroxylase<br>(Salicylate hydroxylase putative, XP_002483592, <i>Talaromyces stipitatus</i> )         | 43/57                     |
| <i>cgsG</i><br>(CHGG_08799) | 472              | GAL4<br>(C6 finger domain protein GliZ, XP_002151409, <i>Penicillium marneffeii</i> )                             | 29/44                     |

[a] Deduced functions of the ORFs identified within the *cgs* biosynthetic gene cluster were based on the percentage sequence similarity/identity to known proteins as determined by Protein BLAST search against the NCBI non-redundant database.

**Table S2.** Oligonucleotide primer sequences. DNA primers were designed on the basis of sequence data obtained from the *Chaetomium globosum* and *Streptomyces hygroscopicus* (for *hph*) genome sequence database.

| Primer name | Sequence (5' to 3')                                 |
|-------------|-----------------------------------------------------|
| 19140-Fw1   | GAAATTGCACCAAGATGAGCCACAACATCGCGG                   |
| 19133-Rv4   | CAAAGGGCGTTTCCGTTGCCCG                              |
| 19133-Rv3   | CTAAAGGGAACAAAAGCTGGTCAAAGGGCGTTTCCGTTGCCCG         |
| 19133-Fw4   | GATTTCCGTAGCCGACCTCGATTATGCC                        |
| 19151-Fw2   | CAGAAAGGCCACCAAGATGAGCCACAACATCGCGG                 |
| 19151-Fw1   | GATCGCAGGTCAGGACTTCAGGCTGGTATAAGATCCAAGGC           |
| 19151-Rv1   | CATCTTGGTGGGCCTTTCTGTAATCCTCAAAGGAGCCG              |
| 19114-Rv3   | CTCCTGACCTGCGATCTTCCCT                              |
| 19133-Fw1   | CTATAGGGCGAATTGGGTACATGATTTCCGTAGCCGACCTCGATTATG    |
| 19121-Fw2   | GAAGATCGCAGGTCAGGACTTCAGGCTGGTATAAGATCCAAGGCTATCG   |
| 19121-Rv2   | CACGGGTGGTGCCATTTGACGGCTGGAAAGGTGC                  |
| 19121-Fw3   | CAAATGGCACCACCCGTGAAACTCCGACCCGCAAGC                |
| 10121-Rv3   | CAAGAGAGTAGGCGCAATTTTCATAGCCACTCAGTCTGCACTG         |
| 19121-Fw4   | GAAATTGGCGCCTACTCTCTTGTAAAGCGTAAGTCAAGATCTCTGC      |
| 19121-Rv4   | CTAAAGGGAACAAAAGCTGGGGAAATACAGGCCGGACTACAGTTGATATAC |
| 19153-Fw1   | GGGCGAATTGGGTACGTTCAAGGGTTCTGCATTGGTTTC             |
| 19153-Rv1   | CAACAGGACTGTAGCGAGACCTGGAAGAAGCGGTGGTTCG            |
| 19153-Fw2   | CTCCACCGTTCCATTGAGAGGAGTTTTGTGTTTGCGGGG             |
| 19153-Rv2   | GAACAAAAGCTGGAGCTGGTGGAGTCTGCCTCGATGAAAGCCG         |
| 19153-Fw3   | CGAACCGCCAAACAACGTAGTCCTC                           |
| 19153-Rv3   | CTCGTATCTGGAAGTCCCATGAGC                            |
| 19154-Fw4   | GGGCGAATTGGGTACCGTGAGGTGAGATCCAGTAAGGCG             |
| 19154-Rv4   | CAACAGGACTGTAGCGGGAAGTGGCGGAGACGGTAGTATAC           |
| 19154-Fw5   | CTCCACCGTTCCATTCCGGTCCCTTCGTGCCCCGTTTCAC            |
| 19154-Rv5   | GAACAAAAGCTGGAGCTGGAGAAATCGCGAAAGGAAGTCGCCTC        |
| 19154-Fw3   | CCAGAGCTTCGGTGAGGCTGCTTAG                           |
| 19154-Rv3   | CAAACACGCTTAGCACGGCACTTGTC                          |
| 19155-Fw1   | GGGCGAATTGGGTACGAACGGGGGAAAGGGGTGAGCCTTG            |
| 19155-Rv1   | CAACAGGACTGTAGCGGGTTGCCGTGGGTGGAGAGCAGAC            |
| 19155-Fw2   | CTCCACCGTTCCATTCCGTCAACGCCCTCATCGAGGAATAC           |
| 19155-Rv2   | GAACAAAAGCTGGAGCTAGTGGCCGTCTCTGGAGGGAACGAC          |
| 19155-Fw3   | GTTATATCCAAGTGAGGGTGCTCGTC                          |
| 19155-Rv3   | CTATCAAGAGACGATCTTGAGCGG                            |
| 19156-Fw1   | GGGCGAATTGGGTACCGCCCCCAAGTTCCAACGCAAAAC             |
| 19156-Rv1   | CAACAGGACTGTAGCTATGGATCAGCCCATGCACATAGC             |
| 19156-Fw2   | CTCCACCGTTCCATTATGTTTTAAGAACTTCTGCGGGGAG            |
| 19156-Rv2   | GAACAAAAGCTGGAGCTCGAACTTTCAAGCGTTGATTATGGAGC        |

|              |                                                    |
|--------------|----------------------------------------------------|
| 19156-Fw3    | GCTACAGTTCAAGGAGGAGAACTC                           |
| 19156-Rv3    | CAAGCCAGCCGAGTAGAGTTACATG                          |
| 19157-Fw1    | GGGCGAATTGGGTACGCCATTATCGCCGGTTAATACAATG           |
| 19157-Rv1    | CAACAGGACTGTAGCTCCACCCCCCTCCCCGTCCGAG              |
| 19157-Fw2    | CTCCACCGTTCCATTATTAGTGAGTATTAAGCAAGGCTGAC          |
| 19157-Rv2    | GAACAAAAGCTGGAGCTGTTGTCATTTCCCCAGCGACC             |
| 19157-Fw3    | GTGGTCCGAGTCACTAAAGGTAG                            |
| 19157-Rv3    | CCCAACTTCTCTTTGCTCCGAGAATC                         |
| 19140-Rv1    | CAAGTCAGCAGCGGCAAGGATTTTCGGCGGGGTTGTATCTTGC        |
| pyrG Fw      | TGCCGCTGCTGACTTGAGGTG                              |
| pyrG Rv      | CTCCTGACCTGCGATCTTCCCT                             |
| 19121-Fw1    | CTATAGGGCGAATTGGGTACGCTGGTTGTCAGTCTAGATCCGGCTGTTTC |
| 19121-Rv1    | CCTCAAGTCAGCAGCGGCAATCGAAGCGTGTATATAGACCGTCTTGC    |
| hph_Fw       | GCTACAGTCCTGTTGCGCCTTCCGG                          |
| hph_Rv       | AATGGAACGGTGGAGAAAGTCCCTGGC                        |
| Cg-KO-hph-Rv | GCACTCGTCCGAGGGCAAAGGAATAG                         |
| Cg-KO-hph-Fw | CGACAGACGTCGCGGTGAGTTCAG                           |
| 19140-Fw1    | GAAATTGCACCAAGATGAGCCACAACATCGCGG                  |

---
